# Supplementary material
Source: HighWire-hosted journal article supplement (https://ez-admanager.com/highwire/filestream/136527/field_highwire_adjunct_files/0/guterman_669.pdf)
Supplement: guterman_669.pdf [file guterman_669.pdf]

# 美国神经系统疾病30天再入院的全国性特点及预测因素

Elan L. Guterman, MD; Vanja C. Douglas, MD; Maulik P. Shah, MD;  
Tennille Parsons, RN; Julio Barba, BA, RRT; S. Andrew Josephson, MD

**目的：**评估美国神经系统疾病住院患者的 30 天再入院率。

**方法：**使用大学健康系统联盟（the University HealthSystem Consortium,UHC）数据库，我们入组了 554,399 例 2011 年 10 月~2015 年 1 月入院的以神经科为索引的患者。收集患者相关资料，包括年龄、种族、投保人、医疗保险严重性诊断相关患者组和疾病严重程度。我们根据诊断对再入院进行评估，并进行多因素 logistic 回归分析以确认再入院的预测因素。

**结果：**计划外的再入院率为 11%。计划外再入院比例最高的依次是周围神经疾病（21.9%）、中枢神经系统肿瘤（21.0%）、非高血压性脑病（15.5%）、动脉硬化（15.4%）以及细菌性中枢神经系统感染（14.5%）患者。多因素分析表明，较高的疾病严重程度和公共健康保险覆盖水平是 30 天高再入院率的预测因素。

**结论：**我们发现，不同神经系统疾病间的再入院率存在显著性差异。这一数据为美国国内的神经系统疾病管理提供了思路、为决策者提供了医疗标准的实际目标、并对医疗服务提供者发展系统性医疗服务解决方案提出了挑战，以此而改善存在再入院高风险的神经系统疾病患者转移后的护理。*Neurology*® 2016;86:669–675

（刘丽萍 审校）
